# Supplementary material for: Maturing Human CD127+ CCR7+ PDL1+ Dendritic Cells Express AIRE in the Absence of Tissue Restricted Antigens
Source: Front Immunol. 2019 Jan 14;9:2902. doi: 10.3389/fimmu.2018.02902 (PMC6340304; doi:10.3389/fimmu.2018.02902)
Supplement: Supplementary file 2 [file Table_1.xls]

## Sheet: Sheet1
Fluorochrome	Marker	Supplier	Clone
APC	BDCA2	Miltenyi Biotec	AC144
BV421	BDCA2	BioLegend	201A
BV421	BDCA3	BioLegend	M80
PE	CCR7	BioLegend	G043H7
APC	CCR7	BioLegend	G043H7
PE	CD103	BioLegend	BecACT8
BV421	CD11b	BioLegend	ICRF44
Alexa Fluor 700	CD11c	BioLegend	Bu15
BV510	CD11c	Sony	3.9
FITC	CD123	BioLegend	6H6
BV421	CD123	BioLegend	6H6
PECy7	CD123	eBioscience	6H6
PECy7	CD127	Beckman Coulter	R34.34
FITC	CD14	BioLegend	HCD14
FITC	CD16	BioLegend	3G8
BV421	CD16	BioLegend	3G8
FITC	CD19	BioLegend	HIB19
Alexa Fluor 647	CD1c	BioLegend	L161
FITC	CD20	BioLegend	2H7
PE	CD25	BioLegend	BC96
APC	CD26	BioLegend	BA5b
FITC	CD3	BioLegend	OKT3
FITC	CD34	BioLegend	581
PE-CF594	CD4	BD Biosciences	RPAT4
BV510	CD40	BioLegend	5C3
PE-CF594	CD45	BD Biosciences	HI30
Alexa Fluor 700	CD45	BioLegend	H130
PECy7	CD45RO	BD Biosciences	UCHL1
PE	CD68	BD Biosciences	Y1/82A
FITC	CD8	BD Biosciences	SK1
BV421	CD80	BD Biosciences	L307.4
FITC	CD80	eBioscience	2D10.4
PE-CF594	CD86	BD Biosciences	2331(FUN-1)
FITC	CD94	Sony	DX22
APC	EpCAM	Miltenyi Biotec	HEA-125
APCCy7	HLA-DR	BioLegend	L243
PE	HLA-DR	BD Biosciences	L243
Alexa Fluor 700	IFNg	BioLegend	B27
APC	isotype IgG1	BioLegend	MOPC-21
APC	isotype IgG2a	BioLegend	MOPC-173
PE-CF594	isotype IgG1	BD Biosciences	X40
PE-CF594	isotype IgG2a	BD Biosciences	R35-95
BV421	isotype IgG1	BioLegend	MOPC-21
PE	isotype IgG1	BD Biosciences	MOPC-21
PE	isotype IgG2a	BioLegend	MOPC-173
PE	isotype IgG2b	BioLegend	MOPC-11
PE-CF594	PDL1	BD Biosciences	MIH1
FITC	TCRab	BioLegend	IP26
FITC	TCRgd	BioLegend	B1
